# Supplementary material
Source: ML conference proceedings conference paper supplement (https://proceedings.neurips.cc/paper_files/paper/2019/hash/fface8385abbf94b4593a0ed53a0c70f-Abstract.html)
Supplement: Supplementary file [file fface8385abbf94b4593a0ed53a0c70f-Supplemental.zip]

---

# Fully Dynamic Consistent Facility Location: Supplementary material

---

**Vincent Cohen-Addad**  
CNRS & Sorbonne Université  
vcohen@di.ens.fr

**Niklas Hjuler**  
University of Copenhagen  
hjuler@di.ku.dk

**Nikos Parotsidis**  
University of Copenhagen  
nipa@di.ku.dk

**David Saulpic**  
Ecole normale supérieure  
Sorbonne Université  
david.saulpic@lip6.fr

**Chris Schwiegelshohn**  
Sapienza University of Rome  
schwiegelshohn@diag.uniroma1.it

## 1 On Meyerson Algorithm

The Meyerson algorithm, presented in [4], is as follows.

---

**Algorithm 1** Meyerson( $X, f$ )

---

**Input:** A set of point  $X$ , an opening cost  $f$

**Output:** A set of centers  $S$  and an assignment  $\phi$  of points to centers

- 1: Let  $S = \emptyset$
  - 2: **for all** point  $x$  in  $X$ , in a random order **do**
  - 3:   Let  $\delta = d(x, S)$
  - 4:   Add  $x$  to  $S$  with probability  $\frac{\delta}{f}$
  - 5:   Define  $\phi(x) = \arg \min_{c \in S} d(x, c)$
  - 6: **end for**
- 

Some key properties of Algorithm 1 are summarized in the following lemma.

**Lemma 1.1** (from [4]). *An execution of Algorithm 1 has complexity  $O(kn)$ , where  $k$  is the number of centers opened at the end. Moreover, the assignment given by  $\phi$  has a cost  $f \cdot |S| + \sum_{x \in X} d(x, \phi(x))$  that is at least  $kf$ , and in expectation is a 8-approximation of the optimal cost.*

## 2 Missing proofs from section 2

**Lemma 2.0** *Let  $(X, d), (Y, d')$  be two metric spaces such that  $X \subseteq Y$  and, restricted to  $X$ ,  $d = d'$ . It holds that  $C(X, OPT_Y) \leq 2C(X, OPT_X)$ .*

*Proof.* Start from the optimal solution  $OPT_Y$  on  $Y$ , with  $k$  centers and where each point  $x$  is assigned to a center  $c_x$ . Consider the solution on  $X$  with  $k$  centers, where the point closest to each

center of  $\text{OPT}_Y$  is opened. Call  $\psi(c)$  the center in  $X$  opened instead of  $c \in \text{OPT}_Y$ .

$$\begin{aligned}
2C(X, \text{OPT}_Y) &\geq 2(kf + \sum_{x \in X} d(x, c_x)) \\
&\geq 2kf + \sum_{x \in X} d(x, c_x) + d(c_x, \psi(c_x)) \\
&\geq kf + \sum_{x \in X} d(x, \psi(c_x)) \geq C(X, \text{OPT}_X)
\end{aligned}$$

Where the last inequality holds because the set of centers  $\psi(c)$  is a valid solution for Facility Location on the set  $X$ .  $\square$

**Lemma 2.2** *Let  $\text{OPT}_{\text{before}}$  be the optimal cost of an initial metric space  $X$ . After an arbitrary sequence of  $n_i$  insertions and  $n_d$  deletions of points in  $X$ , resulting in a metric space  $X_{\text{after}}$ , the optimal solution  $\text{OPT}_{\text{after}}$  satisfies  $C(X, \text{OPT}_{\text{before}})/2 - n_d \cdot f \leq C(X_{\text{after}}, \text{OPT}_{\text{after}}) \leq 2(C(X, \text{OPT}_{\text{before}}) + n_i \cdot f)$*

*Proof.* We remark that inserting a point can increase the optimal cost by at most  $f$  (since opening a facility at the new point yields a solution of that cost).

Let  $\text{OPT}'$  be the value of the optimal solution on  $X \cup \mathcal{I}$  where  $\mathcal{I}$  is the set of  $n_i$  inserted points. By the previous observation, it holds that  $C(X \cup \mathcal{I}, \text{OPT}') \leq C(X, \text{OPT}_{\text{before}}) + n_i \cdot f$ . Let  $X_{\text{after}}$  be the set of points after the sequence of  $n_i$  insertions and  $n_d$  deletions. Since deleting an arbitrary number of points can increase the optimal cost by at most a factor 2 (see Lemma 2.0),  $C(X_{\text{after}}, \text{OPT}_{\text{after}}) \leq 2 \cdot C(X \cup \mathcal{I}, \text{OPT}') \leq 2(C(X, \text{OPT}_{\text{before}}) + n_i \cdot f)$ .

Reversing the roles of  $\text{OPT}_{\text{before}}$  and  $\text{OPT}_{\text{after}}$  gives the other inequality:  $C(X, \text{OPT}_{\text{before}}) \leq 2(C(X_{\text{after}}, \text{OPT}_{\text{after}}) + n_d \cdot f)$ , and concludes the lemma.  $\square$

**Proposition 2.4** *Any algorithm maintaining a constant-factor approximation for Facility Location requires  $\Omega(n^*)$  update time and  $\Omega(n)$  total recourse, where  $n$  is the total number of updates.*

*Proof.* In the static case,  $\Omega(n^2)$  time is required to find a constant factor approximation of Facility Location, even using randomization (see [5]). Hence, even in the incremental case, an amortized time  $\Omega(n^*)$  is necessary.

For the recourse, for all  $c$  we construct an instance that requires  $\Omega(n)$  total recourse in order to maintain a  $c$ -approximation. Set  $f = 1$ , and let  $u$  and  $v$  be two vertices at distance  $2c$ . The stream of updates simply consist in adding  $v$ , then adding and removing  $u$   $n$  times. Any  $c$ -approximation algorithm must add  $u$  as a center at every time  $t$  where  $u \in X^t$ : therefore the total recourse is  $(n - 1)/2 = \Omega(n)$ .  $\square$

**Lemma 2.5** *The algorithm from Section 2 can be adapted so that it maintains a  $O(1)$ -approximate solution, and each update takes time  $O(n^* \cdot \log n^*)$  in the worst-case, with probability  $1 - 1/n^*$ .*

*Proof.* First condition on the event that every time we recompute from scratch we get a  $\alpha$ -approximation, with absolute value  $C(X^{t_0}, S^{t_0})$ . By Lemma 2.3, the algorithm from Section 2 maintains a  $(8 \cdot \alpha + 4)$ -approximate solution for the subsequent  $\frac{C(X^{t_0}, S^{t_0})}{4 \cdot \alpha \cdot f}$  updates with probability  $1 - \frac{1}{n^*}$ . If the last solution was computed at time  $t_0$ , we begin to compute the next solution at time  $t_0 + \frac{C(X^{t_0}, S^{t_0})}{4 \cdot \alpha \cdot f} - \frac{1}{8 \cdot \alpha} \frac{C(X^{t_0}, S^{t_0})}{4 \cdot \alpha \cdot f} = t_1$ . This means that we have  $\frac{1}{8 \cdot \alpha} \frac{C(X^{t_0}, S^{t_0})}{4 \cdot \alpha \cdot f} = x$  updates, before the new solution has to take over, at time  $t_0 + \frac{C(X^{t_0}, S^{t_0})}{4 \cdot \alpha \cdot f}$ . The algorithm starts to recompute a fresh solution during those  $x$  updates, spending  $O(n^* \log n^*)$  per update. We need to show two things: first, that this is indeed enough to recompute a solution, and second that two different recomputations do not overlap. In order to prove those two properties, it is necessary to ensure a deterministic bound on the complexity of Algorithm 1, and not only an expected one. For this, we first show a relation between  $C(X^{t_1}, \text{OPT}^{t_1})$  and  $C(X^{t_0}, \text{OPT}^{t_0})$ .

$$\begin{aligned}
C(X^{t_1}, t_1) &\leq 2 \cdot (C(X^{t_0}, \text{OPT}^{t_0}) + (t_1 - t_0) \cdot f) \\
&\leq 2 \cdot (C(X^{t_0}, \text{OPT}^{t_0}) + \frac{C(X^{t_0}, S^{t_0})}{4\alpha}) \\
&\leq 3 \cdot C(X^{t_0}, \text{OPT}^{t_0})
\end{aligned}$$

This relation shows that any execution of Algorithm 1 that open more than  $128 \cdot \alpha^3 \cdot x$  centers is worthless. Indeed, opening more centers would yield a cost of at least  $128 \cdot \alpha^3 \cdot x \cdot f = 4\alpha C(X^{t_0}, S^{t_0}) \geq 4\alpha C(X^{t_0}, \text{OPT}^{t_0})$  – whereas the expected cost is at most  $3\alpha \cdot C(X^{t_0}, \text{OPT}^{t_0})$ .

Hence, among  $\log 2n^*$  executions of Algorithm 1, one uses less than  $128 \cdot \alpha^3 \cdot x$  centers with probability  $1 - (1/n^*)^2$ . The remark allows to stop the execution of all the ones that uses more centers, and the complexity is *deterministically*  $\tilde{O}(xn^*)$  for all these executions. Spread among  $x$  updates, this is  $\tilde{O}(n^*)$ .

We now prove that two recomputation do not overlap, i.e., that

$$t_0 + \frac{C(X^{t_0}, S^{t_0})}{4 \cdot \alpha \cdot f} \leq t_1 + \frac{C(X^{t_1}, S^{t_1})}{4 \cdot \alpha \cdot f} - \frac{1}{8 \cdot \alpha} \frac{C(X^{t_1}, S^{t_1})}{4 \cdot \alpha \cdot f}.$$

This is equivalent to

$$\frac{1}{8 \cdot \alpha} C(X^{t_0}, S^{t_0}) \leq (1 - \frac{1}{8 \cdot \alpha}) C(X^{t_1}, S^{t_1}).$$

Which is  $C(X^{t_0}, S^{t_0}) \leq (8 \cdot \alpha - 1) C(X^{t_1}, S^{t_1})$ . However, it holds that  $C(X^{t_0}, \text{OPT}^{t_0}) \leq 3C(X^{t_1}, \text{OPT}^{t_1})$ , hence  $C(X^{t_0}, S^{t_0}) \leq 3\alpha C(X^{t_1}, S^{t_1})$ , which concludes.

Notice that the analysis holds, conditioned to the fact that the last time the recomputation happened, the algorithms computed a  $\alpha$ -approximate solution. This happens with probability  $1 - 1/n^*$  each time we recompute. Hence the time bound holds for each individual update with probability  $1 - 1/n^*$ .  $\square$

### 3 Missing proofs from section 3

**Invariant 3.3** *The set  $\mathcal{R}_i^t$  has size  $O(k \log^2 n)$  and, with high probability, there exists  $i$  such that  $C_p(X^t, \mathcal{R}_i^t) = O(1) \cdot C_p(X^t, \text{OPT}^t)$ .*

*Proof.* When  $t$  is a multiple of  $k$ , this stems directly from Lemma 3.2. For sake of simplicity, let's assume that time 1 is the last time MeyersonCapped was called and that  $t < k$ .

$|\mathcal{R}^t|$  increased by  $t$ : it increases by 1 both in the case of point insertion and deletion. Therefore the size stays a  $O(k \log^2 n)$ .

Let  $j = \lfloor \log C_p(X^t, \text{OPT}^t) \rfloor$ : we prove that  $C_p(X^t, \mathcal{R}_j^t) = O(C_p(X^t, \text{OPT}^t))$ . Let  $f = \frac{L_j}{k(1+\log n)}$  be the facility cost for this instance.

The cost does not increase because of points additions, since the algorithm adds every new point directly to  $\mathcal{R}^t$ . We therefore ignore these newly added points in the following, and assume that only deletions occurred. In the following, the proof follows the line of the one in [1], taking into account the deleted points.

Let  $c_1^*, \dots, c_k^*$  be the optimal solution on  $X^t$  and  $C_i^*$  be the set of points assigned to  $c_i^*$ . Let  $A_i^* = \sum_{x \in C_i^*} d(x, c_i^*)^p$  and  $a_i^* = A_i^* / |C_i^*|$ . For  $j = 1, \dots, \log n$  let  $S_j$  be the set of points  $x$  in  $C_i^*$  such that  $2^{j-1} \leq d(x, c_i^*) \leq 2^j$  together with the points  $x \in X_1 \setminus X^t$  such that  $c_i^*$  is their closest center (breaking ties arbitrarily). These points are exactly the one that have been deleted.

Consider the points in  $S_j$ , for  $j \geq 1$ . By linearity of expectation, the expected service cost before a point  $c$  is opened is  $f$ . Any point  $x$  arriving after a center is opened pays in expectation at most  $3 \cdot 2^{p-1}d(x, c_i^*)^p$ . However, it may happen that  $c \in X_1 \setminus X^t$ : in that case, the algorithm replaces it by  $c'$ , the closest point to  $c$  in  $X^t$ . Hence any point  $x$  arriving after  $c$  pays at most  $d(x, c')^p \leq 2^p d(x, c)^p \leq 6 \cdot 2^{2p-1}d(x, c_i^*)^p$ , and the probability that a center is opened at  $x$  is at most  $3 \cdot 2^{2p-1}d(x, c_i^*)^p/f$ .

Now consider the points in  $S_1$ . As before, the expected service cost paid before a point is opened is  $f$ . After a center is opened, the distance from any point  $x$  to its nearest center is at most  $d(x, c_i^*) + a_i^*$ . In the case where the center is in  $X_1$  but not in  $X^t$ , this cost becomes  $2^{p-1}(d(x, c_i^*)^p + 2^p a_i^*)$ . Hence the service cost is bounded by  $2^{2p-1}(d(x, c_i^*)^p + a_i^*)$ , and the probability to open a center at  $x$  is at most  $2^{2p-1}(d(x, c_i^*)^p + a_i^*)/f$ .

The expected service cost for points of  $C_i^*$  is therefore  $f(1 + \log n) + 2^{2p-1} \sum_{x \in C_i^*} 3d(x, c_i^*) + a_i^* \leq L/k + 2^{2p+2}C_p(C_i^*, \text{OPT}^t)$ . Summing over all clusters gives that the expected service cost is at most  $L + 2^{2p+2}C_p(X^t, \text{OPT}^t) \leq 2^{2p+3}C_p(X^t, \text{OPT}^t)$ . Moreover, the expected number of centers opened by the algorithm is  $1 + \log n + 2^{2p-1}/f \sum_{x \in C_i^*} 3d(x, c_i^*) + a_i^* \leq 1 + \log n + 2^{2p+2}A_i^*/f$ . Summing again over all clusters gives that at most  $k(1 + \log n)(1 + 2^{2p+2} \frac{C_p(X^t, \text{OPT}^t)}{L}) \leq k(1 + \log n)(1 + 2^{2p+3})$  centers are opened.

Hence, with probability  $1/2$ , the service cost is  $2^{2p+4}C_p(X^t, \text{OPT}^t)$  and the number of centers is at most  $2^{2p+4}k(1 + \log n)$ . Since the algorithm opens exactly  $2^{2p+4}k(1 + \log n)$  centers, this solution is found by the algorithm and  $C_p(X^t, \mathcal{R}^t) \leq 2^{2p+3}C_p(X^t, \text{OPT}^t)$ . Since the algorithm maintains  $O(\log n)$  independent execution of the algorithm, this cost is ensured with high probability, which concludes the lemma.  $\square$

**Lemma 3.4** *Let  $\text{OPT}_{\mathcal{R}_i^t}$  be the optimal solution in the weighted set  $\mathcal{R}_i^t$ . Then it holds that  $C_p(X^t, \text{OPT}_{\mathcal{R}_i^t}) \leq 2^{3p-1}(C_p(X, \mathcal{R}_i^t) + C_p(X^t, \text{OPT}^t))$*

This lemma is stated in [3], and generalize Theorem 2.3 in [2] to any value of  $p$ . For sake of completeness, we provide here a proof.

*Proof.* The proof stems from the two following inequalities:

- $C_p(X, \text{OPT}_{\mathcal{R}_i^t}) \leq 2^{p-1}(C_p(X, \mathcal{R}^t) + C_p(\mathcal{R}^t, \text{OPT}_{\mathcal{R}_i^t}))$
- $C_p(\mathcal{R}^t, \text{OPT}_{\mathcal{R}_i^t}) \leq 2^{2p-1}(C_p(X, \mathcal{R}^t) + C_p(X^t, \text{OPT}^t))$

Combining those two inequalities yields directly the lemma.

In order to prove those, we use the generalized triangle inequality  $\forall x, y, z \in X, d(x, z)^p \leq 2^{p-1}(d(x, y)^p + d(y, z)^p)$ . For any point  $x$  and set  $S$ , we denote  $S(x)$  the closest point in  $S$  to  $x$ .

Let  $x \in X$  and  $y \in \mathcal{R}^t$  be its closest point in  $\mathcal{R}^t$ , such that  $x$  contributes 1 in the weight of  $y$ .

We first prove the first inequality. It holds that  $d(x, \text{OPT}_{\mathcal{R}_i^t})^p \leq d(x, \text{OPT}_{\mathcal{R}_i^t}(y))^p \leq 2^{p-1}(d(x, y)^p + d(y, \text{OPT}_{\mathcal{R}_i^t}(y))^p)$ . Since the point  $y$  is weighted by the number of points assigned to it, summing over all  $x, y$  gives exactly  $C_p(X, \text{OPT}_{\mathcal{R}_i^t}) \leq 2^{2p-1}(C_p(X, \mathcal{R}^t) + C_p(\mathcal{R}^t, \text{OPT}_{\mathcal{R}_i^t}))$ .

For the second inequality, we consider the solution  $S$  for the weighted set  $\mathcal{R}^t$  consisting in the set of centers  $\{\mathcal{R}^t(c), c \in \text{OPT}^t\}$ , and show that this solution has cost at most  $2^{2p-1}(C_p(X, \mathcal{R}^t) + C_p(X^t, \text{OPT}^t))$ . Indeed, it holds that  $d(y, S(y))^p \leq d(y, S(x))^p \leq 2^{p-1}(d(x, y)^p + d(x, S(x))^p)$ . By definition of the set  $S$ ,  $d(x, S(x)) \leq 2d(x, \text{OPT}(x))$ ; therefore

$$d(y, S(y))^p \leq 2^{2p-1}(d(x, y)^p + d(x, \text{OPT}(x))^p).$$

Summing over all  $x, y$  proves the desired inequality, and concludes the proof.  $\square$

**Theorem 3.1** *There exists a randomized algorithm that, given a metric space undergoing insertions and deletions of points, maintains a set of centers  $S^t$  with  $\tilde{O}((n^* + k^2))$  update time such that, for any time  $t$ ,  $C_p(X^t, S^t) = O(1) \cdot C_p(X^t, OPT^t)$ .*

*Proof.* Combining Invariant 3.3 and Lemma 3.4 proves the approximation ratio. We therefore turn on to the complexity bound.

Running the static algorithm on each coreset  $\mathcal{R}_i^t$  takes time  $\tilde{O}(k^2)$ , as the set  $\mathcal{R}_i^t$  has size  $O(k \log^2 n)$ . Since the algorithm maintains  $O(\log n)$  coresets of that size, the total cost for computations of the static algorithm is  $\tilde{O}(k^2)$ .

The cost of maintaining  $\mathcal{R}^t$  is similar to the one described in Section 2. The cost between two executions of MeyersonCapped is indeed  $\tilde{O}(nk)$ : since  $\tilde{O}(k)$  centers are maintained, running MeyersonCapped takes time  $\tilde{O}(nk)$ . Moreover, a single execution of DeletePoint takes time  $\tilde{O}(n + (t_l^e - t_l^b) \cdot k)$  (where  $t_l^b$  and  $t_l^e$  are the values of  $t_l$  at that beginning and the end of the execution). Therefore, subsequent executions of DeletePoint take a total of  $\tilde{O}(nk)$  time. Since a computation of MeyersonCapped occurs every  $k$  updates, the amortized cost to maintain the sets  $\mathcal{R}_1, \dots, \mathcal{R}_{\log n}$  is  $\tilde{O}(n)$  per update, and the total amortized cost  $\tilde{O}(n + k^2)$ .  $\square$

#### 4 Experiment: additional figures

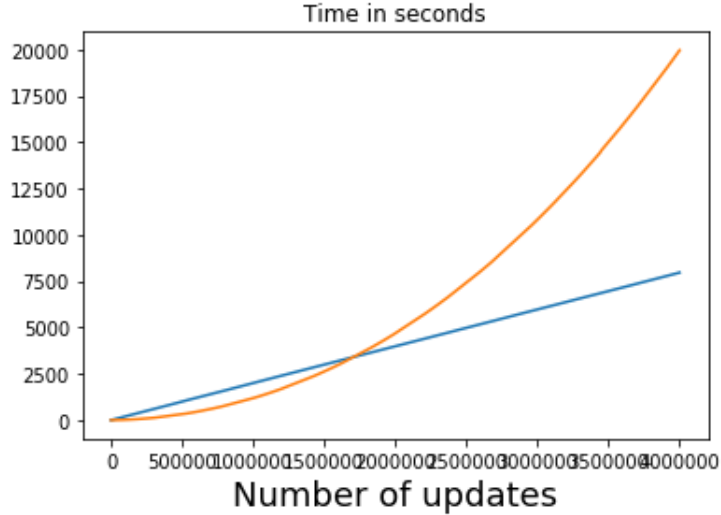

Figure 1: Time for the whole Twitter dataset. MeyersonSingle is plotted in Orange, Our algorithm in blue and MeyersonRec is too slow to run on this dataset.

#### References

- [1] M. Charikar, C. Chekuri, T. Feder, and R. Motwani. Incremental clustering and dynamic information retrieval. *SIAM J. Comput.*, 33(6):1417–1440, 2004.
- [2] S. Guha, N. Mishra, R. Motwani, and L. O’Callaghan. Clustering data streams. In *41st Annual Symposium on Foundations of Computer Science, FOCS 2000, 12-14 November 2000, Redondo Beach, California, USA*.
- [3] S. Lattanzi and S. Vassilvitskii. Consistent k-clustering. In *Proceedings of the 34th International Conference on Machine Learning (ICML)*, pages 1975–1984, 2017.
- [4] A. Meyerson. Online facility location. In *42nd Annual Symposium on Foundations of Computer Science (FOCS)*, pages 426–431, 2001.

- [5] M. Thorup. Quick k-median, k-center, and facility location for sparse graphs. *SIAM J. Comput.*, 34(2):405–432, 2004.
